# Supplementary material for: Pharmacist-Driven Antibiotic Stewardship Program in Febrile Neutropenic Patients: A Single Site Prospective Study in Thailand
Source: MDPI journal article supplement (doi:10.3390/antibiotics10040456), 2021-04-17
Supplement: s1 [file s1]

## Supplementary data

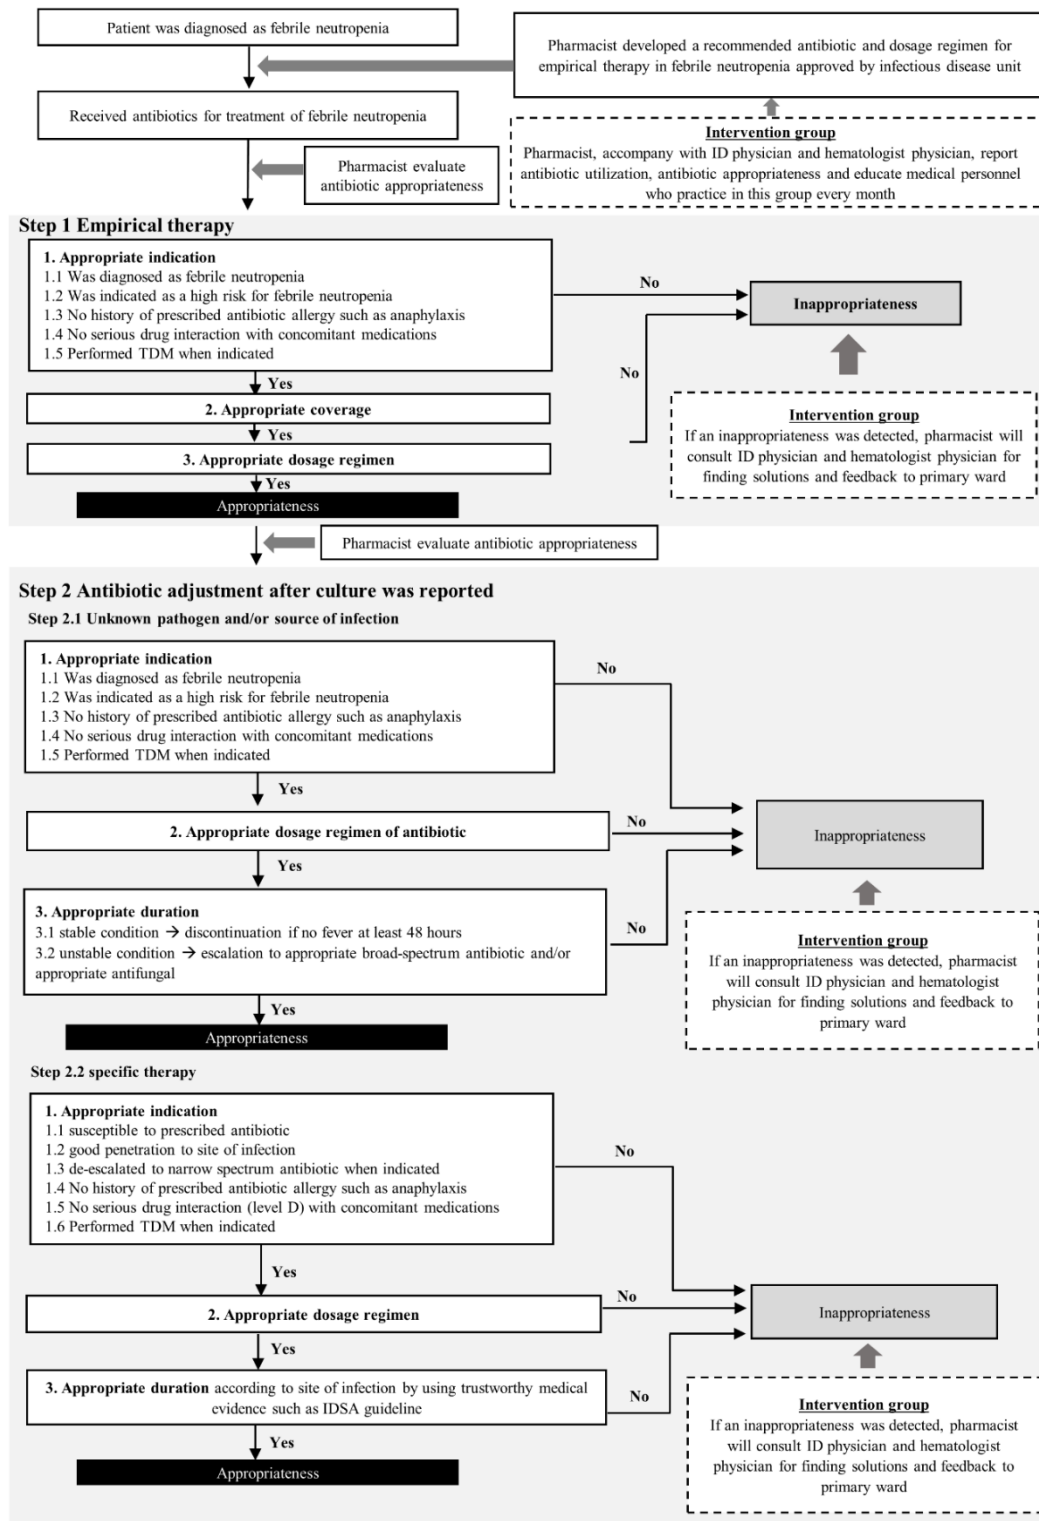

**Figure S1.** Criteria of antibiotic appropriateness evaluation

ID, infectious diseases; IDSA, Infectious Disease Society of America; TDM, Therapeutic drug monitoring  
Therapeutic drug monitoring was referred to vancomycin and voriconazole monitoring.

Stable condition was defined as no hemodynamic instability condition, no fever at least 48 hours.

**Table S1.** Antibiotics utilization

| DDD/1000 patient day     | Intervention group   |             |                |                | Control group        |             |                |                |
|--------------------------|----------------------|-------------|----------------|----------------|----------------------|-------------|----------------|----------------|
|                          | Mean $\pm$ SD        | coefficient | Standard error | <i>P</i> value | Mean $\pm$ SD        | coefficient | Standard error | <i>P</i> value |
| Ceftazidime              | 206.56 $\pm$ 176.20  | -4.286      | 24.264         | 0.865          | 211.04 $\pm$ 128.47  | -22.390     | 15.581         | 0.194          |
| Cefepime                 | 53.79 $\pm$ 69.55    | -0.343      | 9.598          | 0.972          | 42.30 $\pm$ 38.68    | 5.927       | 27.268         | 0.656          |
| Piperacillin/tazobactam  | 388.60 $\pm$ 163.01  | 20.315      | 21.147         | 0.369          | 288.75 $\pm$ 131.69  | 1.915       | 18.161         | 0.919          |
| Meropenem                | 194.43 $\pm$ 88.19   | -6.363      | 11.932         | 0.610          | 163.01 $\pm$ 79.39   | 17.472      | 8.743          | 0.086          |
| Imipenem                 | 38.61 $\pm$ 81.75    | 3.801       | 11.191         | 0.744          | 0.00                 | -           | -              | -              |
| Total target antibiotics | 882.00 $\pm$ 280.30  | 13.124      | 38.366         | 0.742          | 705.10 $\pm$ 193.01  | 2.923       | 26.615         | 0.916          |
| Total antibiotics        | 1249.32 $\pm$ 475.86 | -2.726      | 65.666         | 0.968          | 1113.63 $\pm$ 242.63 | 48.308      | 27.975         | 0.128          |

DDD, daily defined dose; SD, standard deviation

**Table S2.** Antibiotic appropriateness in documentation therapy: unknown source of infection

| Outcomes                   | Intervention<br>(20 FN episodes),<br>No. (%) | Control<br>(22 FN episodes),<br>No. (%) | <i>P</i> value |
|----------------------------|----------------------------------------------|-----------------------------------------|----------------|
| Overall appropriateness    | 18 (40)                                      | 12 (26.7)                               | 0.039          |
| Appropriate indication     | 20 (44.4)                                    | 22 (48.9)                               | 0.416          |
| Appropriate dosage regimen | 20 (44.4)                                    | 20 (44.4)                               | 0.638          |
| Appropriate duration       | 18 (40)                                      | 13 (28.9)                               | 0.066          |

FN, febrile neutropenic

**Table S3.** Antibiotic appropriateness in documentation therapy: known causative pathogens and source of infection

| Outcomes                   | Intervention<br>(24 FN episodes),<br>No. (%) | Control<br>(23 FN episodes),<br>No. (%) | <i>P</i> value |
|----------------------------|----------------------------------------------|-----------------------------------------|----------------|
| Overall appropriateness    | 23 (51.1)                                    | 17 (37.8)                               | 0.116          |
| Appropriate indication     | 23 (51.1)                                    | 19 (42.2)                               | 0.394          |
| Appropriate dosage regimen | 24 (53.3)                                    | 22 (48.9)                               | 0.833          |
| Appropriate duration       | 23 (51.1)                                    | 21 (46.7)                               | 0.872          |

FN, febrile neutropenic
